# Supplementary material
Source: publisher site journal article supplement (https://neobiota.pensoft.net/article/90473/download/suppl/32/)

**Supplementary material 2** for the article by Andrey N. Reshetnikov et al. “Rarely naturalized, but widespread and even invasive: the paradox of a popular pet terrapin expansion in Eurasia”.

Journal: NeoBiota.

Corresponding author: Andrey N. Reshetnikov

e-mail: anreshetnikov@yandex.ru

**Figure 1S.** Eurasian subregions as accepted in the current article

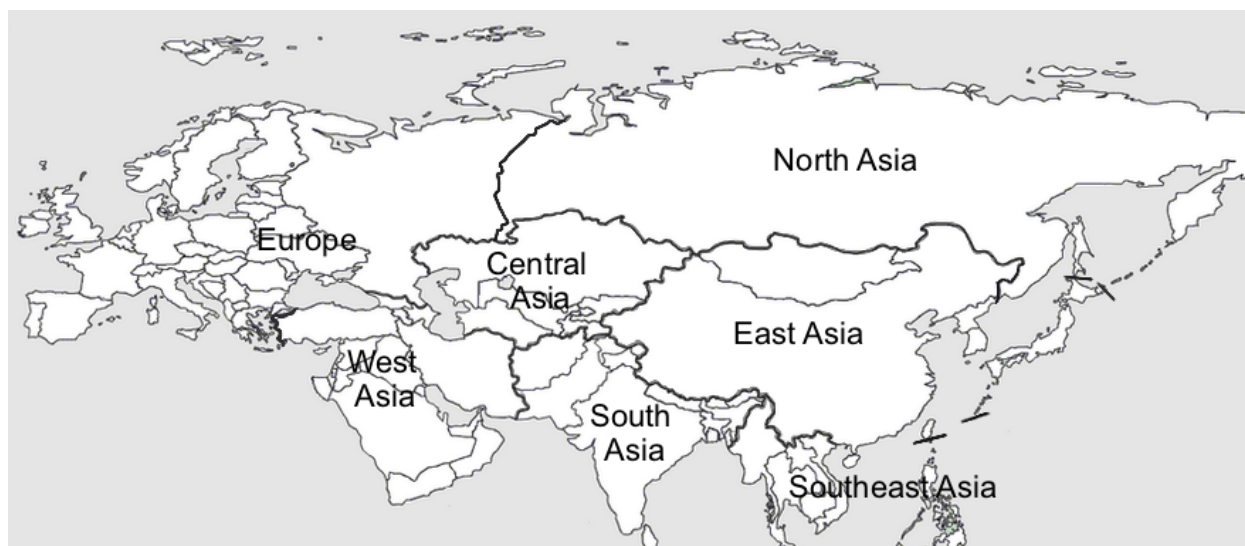

Supplement: Supplementary file 1
